# Supplementary material for: Factors associated with work engagement of nurses in the radiology department, Japan: a cross-sectional study
Source: PeerJ. 2024 Nov 18;12:e18426. doi: 10.7717/peerj.18426 (PMC11580675; doi:10.7717/peerj.18426)
Supplement: Supplemental Information 1 [file peerj-12-18426-s001.xlsx]

## Sheet: df
	①At my work, I feel bursting with energy	②I find the work that I do full of meaning and purpose	③Time flies when I'm working	⓸At my job, I feel strong and vigorous	⑤ I am enthusiastic about my job	⑥ When I am working, I forget everything else around me	⑦My job inspires me	⑧When I get up in the morning, I feel like going to work	⑨I feel happy when I am working intensely	⑩ I am proud on the work that I do	⑪I am immersed in my work	⑫I can continue working for very long periods at a time	⑬To me, my job is challenging	⑭I get carried away when I’m working	⑮At my job, I am very resilient, mentally	⑯It is difficult to detach myself from my job	⑰At my work I always persevere, even when things do not go well	How do you feel about the dose on your personal dosimeter?	Is radiation exposure management being carried out appropriately at your workplace?	Does your workplace have a system in place for consultation about exposure to radiation?	Do you think your radiation protection measures are sufficient?	Do you think there is an effect on your health from occupational radiation exposure?	Do you think your radiation exposure will affect the health of your children?	Age	Gender	Marital Status	Having minor children	Years as nurse	Nursing experience with radiology department (years)	Position	Post-employment qualifications	Desire to be assigned to the radiology department	Place of work
1	3	4	4	2	4	4	4	3	2	4	2	1	2	2	2	3	2	3	4	5	5	4	3	35	Female	Married	Yes	11ー15	1	Nurse	Yes	Yes	Diagnostic imaging	Angiography	Nuclear medicine
2	3	3	4	3	3	3	3	3	3	3	2	1	3	2	3	5	4	2	5	3	5	2	2	40	Female	Unmarried	No	16－20	3	Nurse	none	No	Angiography	Endoscopy / Fluoroscopy	Nuclear medicine
3	4	5	4	5	5	4	4	3	4	6	4	4	3	4	5	1	4	1	1	0	3	3	5	52	Female	Married	No	31 or more	4	Nurse	none	No	Angiography	Endoscopy / Fluoroscopy	Nuclear medicine	Radiotherapy
4	0	2	3	0	6	6	0	0	4	3	6	0	1	6	0	6	6	6	6	0	5	6	6	47	Prefer not to answer	Married	Yes	21－25	5	Nurse	none	No	Angiography	Endoscopy / Fluoroscopy
5	4	4	3	2	3	5	3	0	2	3	3	1	4	4	3	0	4	1	5	2	5	2	0	32	Female	Unmarried	Yes	5―10	6	Nurse	none	Yes	N/A
6	2	4	4	2	2	0	2	0	1	4	1	5	2	2	4	1	1	2	4	3	5	1	1	37	Female	Married	Yes	16―20	5	Nurse	none	No	Diagnostic imaging	Angiography	Endoscopy / Fluoroscopy
7	3	6	6	3	6	3	3	3	3	6	6	2	3	6	3	6	5	3	5	3	4	4	4	58	Female	Unmarried	No	31 or more	5	Nurse manager	none	No	management
8	4	6	6	4	5	4	6	5	3	6	5	3	4	6	5	6	6	3	3	3	3	3	2	39	Male	Married	Yes	16－20	6	Nurse	Yes	Yes	Diagnostic imaging	Angiography	Endoscopy / Fluoroscopy	Nuclear medicine	Radiotherapy
9	4	6	6	5	5	3	4	3	3	5	3	1	3	3	3	2	4	4	6	6	4	4	2	58	Female	Married	No	31 or more	10 or more	Nurse	none	Yes	Nuclear medicine	Radiotherapy
10	4	4	4	4	4	3	4	3	4	4	3	3	4	4	4	2	3	4	3	2	3	3	4	48	Female	Married	Yes	11ー15	9	Nurse	none	No	Nuclear medicine
11	3	4	5	3	3	3	4	2	2	4	3	4	3	3	3	2	4	0	6	3	6	0	0	43	Female	Unmarried	No	21－25	3	Nurse manager	none	Yes	Radiotherapy
12	3	3	4	3	3	4	4	2	2	3	4	3	3	5	3	5	4	2	5	5	5	1	4	58	Female	Unmarried	No	26－30	2	Nurse manager	Yes	No	management
13	4	4	5	4	4	3	3	2	2	4	3	3	3	3	3	2	3	4	6	5	5	5	2	23	Female	Married	No	Less than 5	2	Nurse	none	No	Angiography	Radiotherapy
14	2	3	6	4	5	4	5	2	3	4	3	3	4	4	4	3	4	3	5	1	3	3	3	37	Female	Married	Yes	11ー15	1	Nurse	none	Yes	Radiotherapy
15	5	6	6	3	6	5	5	3	4	6	6	6	5	6	5	6	6	3	3	3	3	3	0	45	Female	Married	Yes	21－25	8	Nurse manager	Yes	Yes	Radiotherapy
16	4	4	5	4	4	5	6	4	2	5	0	1	4	1	3	0	4	3	6	6	5	1	1	43	Female	Married	Yes	16―20	5	Nurse	none	No	Nuclear medicine
17	3	2	2	2	2	2	2	2	3	2	2	4	3	2	2	2	3	2	4	3	4	2	2	51	Female	Married	Yes	26－30	10 or more	Nurse manager	Yes	No	Angiography
18	3	3	3	1	4	3	0	0	0	2	0	0	0	0	0	4	4	4	2	3	2	4	3	33	Female	Unmarried	No	11ー15	6	Nurse	none	No	Angiography
19	0	0	3	0	3	3	0	0	0	0	0	3	0	0	0	2	5	2	3	2	3	3	2	27	Female	Unmarried	No	5―10	1	Nurse	Yes	No	Angiography
20	2	3	4	1	3	3	3	1	1	3	4	2	2	4	2	6	4	5	5	5	3	3	2	44	Female	Married	Yes	21－25	4	Nurse	none	No	Angiography	Endoscopy / Fluoroscopy	Nuclear medicine
21	0	0	3	0	0	0	0	0	0	0	0	0	0	0	0	6	6	3	5	3	6	0	0	38	Female	Married	No	11―15	5	Nurse	Yes	No	Nuclear medicine
22	1	3	4	0	3	1	2	0	1	4	3	1	2	2	0	4	4	0	5	5	5	4	6	34	Female	Unmarried	No	11―15	1	Nurse manager	none	No	Radiotherapy
23	3	4	4	1	3	3	3	2	2	3	3	3	3	3	2	3	3	3	4	3	4	4	0	49	Female	Unmarried	No	21－25	2	Nurse	none	No	Angiography	Endoscopy / Fluoroscopy	Nuclear medicine
24	4	5	5	5	5	3	4	1	3	5	3	2	4	4	3	0	3	3	5	4	5	4	1	57	Female	Married	No	31 or more	10 or more	Nurse	none	No	Nuclear medicine	Radiotherapy
25	0	2	5	1	3	5	1	0	0	2	1	2	1	1	1	5	4	3	3	3	4	4	2	25	Female	Unmarried	No	Less than 5	3	Nurse	none	No	Angiography	Radiotherapy
26	4	4	5	4	4	4	4	3	3	5	3	6	3	3	4	2	5	3	4	3	3	3	3	47	Female	Married	Yes	21－25	7	Nurse	none	Yes	Angiography	Endoscopy / Fluoroscopy	Nuclear medicine
27	4	5	4	2	5	2	3	1	2	5	2	1	2	2	2	2	4	4	4	5	2	2	4	52	Female	Married	Yes	26－30	9	Nurse	Yes	No	Endoscopy / Fluoroscopy
28	3	3	3	2	3	2	3	1	3	3	3	3	4	3	2	2	4	3	3	3	3	1	4	29	Female	Unmarried	No	5―10	4	Nurse	none	No	Angiography
29	3	6	5	3	6	4	3	3	3	5	3	3	3	4	3	2	5	0	5	3	3	4	0	43	Female	Married	Yes	21－25	10 or more	Nurse manager	Yes	No	Diagnostic imaging	Angiography	Endoscopy / Fluoroscopy	Nuclear medicine	Radiotherapy
30	4	5	6	5	4	4	5	3	5	6	4	0	3	4	6	3	4	6	6	6	5	3	3	59	Female	Married	No	31 or more	3	Nurse manager	none	No	Radiotherapy
31	3	4	5	3	4	4	4	3	3	4	1	1	2	3	2	2	3	1	5	3	5	2	0	55	Female	Unmarried	No	31 or more	7	Nurse manager	none	No	Angiography	Radiotherapy	Nuclear medicine
32	3	3	3	2	4	2	5	2	2	4	3	0	3	2	2	4	3	3	4	3	2	3	0	54	Female	Unmarried	No	31 or more	7	Nurse manager	Yes	No	Angiography	Endoscopy / Fluoroscopy
33	2	3	5	1	1	2	1	0	0	1	0	0	0	0	0	5	5	4	4	3	4	4	2	38	Female	Unmarried	Yes	Less than 5	4	Nurse	none	No	Angiography	Radiotherapy	Nuclear medicine
34	5	5	5	4	5	3	5	4	4	5	5	5	5	4	4	1	5	4	2	3	3	4	3	38	Female	Married	Yes	11―15	2	Nurse	none	Yes	Angiography	Endoscopy / Fluoroscopy
35	2	4	4	1	3	4	2	1	1	5	1	0	1	2	4	0	4	1	5	3	5	4	0	60	Female	Married	No	31 or more	8	Nurse	none	No	Radiotherapy
36	4	5	5	5	5	4	4	3	3	5	4	4	4	4	3	3	3	3	6	6	5	1	5	51	Female	Married	Yes	21－25	6	Nurse	none	No	Angiography	Nuclear medicine	Radiotherapy
37	3	5	6	3	3	2	3	3	3	4	3	1	3	3	3	2	3	1	3	3	3	3	2	45	Female	Married	Yes	21－25	2	Nurse	Yes	No	Diagnostic imaging	Nuclear medicine	Radiotherapy
38	4	5	6	5	5	4	4	4	3	5	3	3	4	4	4	1	4	4	5	5	4	4	3	45	Female	Married	Yes	21－25	10 or more	Nurse	none	No	Angiography	Endoscopy / Fluoroscopy
39	4	5	5	4	4	5	5	5	5	6	5	3	4	5	5	2	4	4	6	6	2	2	4	39	Female	Married	Yes	11―15	9	Nurse	none	No	Diagnostic imaging	Angiography	Endoscopy / Fluoroscopy	Nuclear medicine	Radiotherapy
40	5	5	6	6	5	5	6	5	5	6	5	4	5	4	5	3	5	3	6	6	5	2	0	48	Female	Married	Yes	16―20	7	Nurse	none	No	Diagnostic imaging	Angiography	Endoscopy / Fluoroscopy
41	5	5	6	4	5	5	4	4	3	4	3	5	3	5	4	0	4	3	6	6	6	3	3	58	Female	Married	No	31 or more	1	Nurse	Yes	No	Diagnostic imaging
42	2	6	0	1	5	5	1	3	0	5	4	5	1	5	1	1	6	1	5	5	5	1	0	51	Female	Unmarried	No	11―15	5	Nurse	none	No	Diagnostic imaging	Angiography	Endoscopy / Fluoroscopy	Radiotherapy
43	2	1	3	1	2	4	3	3	1	4	0	0	1	1	1	1	1	1	6	4	6	3	0	42	Female	Married	Yes	21－25	7	Nurse	none	No	Diagnostic imaging	Angiography	Endoscopy / Fluoroscopy	Nuclear medicine	Radiotherapy
44	3	3	5	3	3	3	3	3	3	3	3	3	3	3	3	3	3	3	3	3	3	4	0	40	Female	Married	Yes	16―20	10 or more	Nurse	none	No	Diagnostic imaging	Angiography	Endoscopy / Fluoroscopy	Radiotherapy
45	3	6	5	3	4	5	4	2	3	4	3	2	3	4	3	1	3	3	6	4	4	1	0	53	Female	Married	No	26－30	7	Nurse	Yes	No	Diagnostic imaging	Nuclear medicine	Radiotherapy
46	5	6	6	5	6	4	5	4	5	6	4	6	5	5	5	4	4	3	2	4	5	2	0	42	Male	Married	Yes	21－25	4	Nurse	Yes	No	Diagnostic imaging	Angiography	Endoscopy / Fluoroscopy	Nuclear medicine	Radiotherapy
47	1	3	3	2	2	2	1	2	2	3	2	4	2	2	1	2	3	2	5	4	4	3	3	41	Female	Married	Yes	5―10	1	Nurse	none	No	Diagnostic imaging	Angiography
48	3	5	4	4	4	4	4	1	2	5	2	1	3	2	4	2	3	3	2	4	4	4	1	27	Female	Unmarried	No	5―10	3	Nurse	none	No	Diagnostic imaging	Angiography
49	2	4	4	2	3	2	1	1	1	3	3	1	1	1	1	1	1	2	5	3	5	5	6	25	Female	Unmarried	No	Less than 5	3	Nurse	none	No	Angiography	Endoscopy / Fluoroscopy	Nuclear medicine
50	4	5	4	4	3	3	3	0	4	4	2	3	3	4	2	2	2	1	5	5	5	1	2	28	Female	Unmarried	No	5―10	3	Nurse	none	No	Diagnostic imaging	Angiography	Endoscopy / Fluoroscopy
51	3	3	5	3	3	3	3	3	3	3	3	3	3	3	3	3	4	3	6	5	5	1	3	58	Female	Unmarried	No	31 or more	10 or more	Nurse	none	No	Angiography
52	2	3	2	2	2	2	2	0	0	3	1	0	2	2	2	2	1	3	4	3	2	4	1	42	Female	Married	Yes	16―20	2	Nurse	none	No	Angiography	Nuclear medicine	Radiotherapy
53	4	5	5	4	4	4	5	5	5	5	4	3	4	4	3	3	5	3	5	5	5	1	1	44	Female	Married	Yes	16―20	1	Nurse	none	No	Diagnostic imaging	Angiography	Nuclear medicine
54	3	4	5	3	5	0	3	2	1	3	3	4	3	2	2	0	4	2	5	6	4	1	3	34	Female	Married	Yes	5―10	5	Nurse	none	No	Angiography	Endoscopy / Fluoroscopy	Radiotherapy
55	3	3	4	2	3	2	2	1	2	4	3	2	2	3	2	3	3	2	2	2	4	4	5	25	Female	Married	Yes	Less than 5	4	Nurse	none	No	Endoscopy / Fluoroscopy
56	5	6	6	5	6	4	5	6	5	5	6	5	5	5	6	6	6	5	6	5	5	2	2	60	Male	Married	Yes	31 or more	6	Nurse	N/A	Yes	Angiography	Nuclear medicine	Radiotherapy
57	4	5	6	4	5	3	5	4	3	6	6	4	5	5	4	5	6	0	6	6	6	0	1	50	Female	Married	No	21－25	7	Nurse manager	Yes	Yes	Radiotherapy
58	4	5	6	5	5	5	5	5	5	5	6	5	5	5	5	5	6	0	3	5	4	3	0	46	Female	Married	Yes	Less than 5	2	Nurse manager	none	No	Endoscopy / Fluoroscopy	management
59	3	5	4	4	4	4	4	3	3	4	3	2	3	2	3	0	3	2	4	4	4	0	0	44	Female	Married	Yes	21－25	8	Nurse	Yes	No	Diagnostic imaging	Angiography
60	2	2	5	3	3	3	2	2	2	4	2	1	2	2	3	2	5	3	5	4	4	5	1	23	Female	Unmarried	No	Less than 5	2	Nurse	none	No	Diagnostic imaging	Angiography
61	6	6	6	6	6	4	5	6	5	6	6	6	6	6	6	4	5	3	5	5	4	0	4	38	Male	Married	Yes	16―20	4	Nurse	Yes	Yes	Diagnostic imaging	Angiography
62	3	3	4	2	2	3	3	1	1	3	0	0	1	0	1	0	6	3	2	2	2	5	3	46	Female	Married	Yes	16―20	10 or more	Nurse	none	No	Diagnostic imaging
63	1	4	6	0	3	3	1	1	2	4	1	0	0	1	1	4	1	3	5	6	5	3	0	50	Female	Married	Yes	26―30	2	Nurse	none	No	Angiography	Endoscopy / Fluoroscopy	Nuclear medicine	Radiotherapy
64	3	4	4	3	5	2	5	2	2	4	2	2	2	3	3	2	4	2	4	2	3	3	2	46	Female	Married	Yes	16―20	6	Nurse manager	none	No	Radiotherapy
65	0	1	2	0	1	1	0	0	0	2	0	0	0	0	0	6	6	6	1	0	0	6	0	39	Female	Married	Yes	16―20	5	Nurse	none	No	Angiography	Endoscopy / Fluoroscopy
66	3	1	2	2	2	2	2	1	1	0	1	0	1	1	1	1	2	1	2	3	4	4	4	34	Female	Married	Yes	5―10	2	Nurse	none	No	Radiotherapy
67	3	4	4	3	5	4	4	2	2	5	4	5	3	2	4	3	5	3	4	2	3	2	0	48	Female	Married	Yes	26―30	6	Nurse	none	No	Angiography	Endoscopy / Fluoroscopy	Radiotherapy
68	1	1	1	1	0	1	0	0	1	1	1	1	0	1	0	0	0	3	3	2	3	3	3	42	Female	Married	Yes	16―20	1	Nurse	none	Yes	Endoscopy / Fluoroscopy
69	0	0	6	0	0	0	0	0	0	0	0	0	0	0	0	0	6	3	1	1	2	4	2	52	Female	Unmarried	Yes	26―30	7	Nurse	none	No	Nuclear medicine
70	4	4	4	3	4	0	4	1	1	5	2	0	3	1	1	0	3	1	4	5	3	2	0	35	Female	Married	Yes	11―15	7	Nurse	none	No	Diagnostic imaging	Angiography	Radiotherapy
71	3	4	6	4	5	5	4	2	0	4	4	0	4	1	3	5	5	3	6	6	6	6	6	45	Female	Unmarried	No	21－25	1	Nurse manager	none	No	Diagnostic imaging	Angiography
72	6	6	6	5	5	4	5	6	4	6	4	4	5	6	4	6	6	0	6	6	6	0	1	50	Female	Unmarried	Yes	26―30	7	Nurse	Yes	Yes	Nuclear medicine	Radiotherapy
73	2	5	4	3	5	1	3	1	1	5	2	5	3	3	2	3	5	1	1	2	2	3	0	45	Female	Married	Yes	21―25	6	Nurse	none	No	Angiography	Diagnostic imaging
74	6	6	6	6	6	3	6	4	3	4	4	3	4	3	4	3	3	0	6	6	6	4	1	53	Female	Unmarried	No	26―30	3	Nurse manager	Yes	No	Nuclear medicine	Angiography
75	3	3	3	2	3	2	3	2	2	4	3	2	3	3	3	2	4	0	4	6	5	1	0	53	Female	Married	No	31 or more	10 or more	Nurse manager	Yes	Yes	Radiotherapy
76	3	2	3	3	5	3	2	2	1	3	2	0	1	1	2	2	4	3	3	3	3	3	3	38	Female	Married	Yes	16―20	6	Nurse	none	No	Angiography	Radiotherapy
77	3	4	3	4	4	1	5	4	3	5	3	5	4	4	4	4	4	3	5	6	4	5	3	44	Female	Married	Yes	21－25	10 or more	Nurse	Yes	No	Diagnostic imaging	Angiography	Endoscopy / Fluoroscopy
78	2	4	2	2	2	2	2	2	2	2	2	5	2	2	2	0	4	1	5	4	5	3	2	23	Female	Unmarried	No	Less than 5	1	Nurse	none	No	Diagnostic imaging	Angiography
79	4	5	4	4	4	3	4	3	3	4	3	4	3	2	4	1	3	3	4	4	4	1	1	54	Female	Married	No	31 or more	7	Nurse	none	No	Diagnostic imaging	Angiography	Endoscopy / Fluoroscopy
80	4	4	5	4	5	3	5	5	5	5	4	3	3	4	4	4	4	1	5	3	4	1	1	58	Female	Married	No	31 or more	5	Nurse manager	none	No	management
81	4	4	6	4	5	3	5	3	4	5	3	2	4	4	3	3	3	0	6	6	5	4	0	38	Female	Unmarried	Yes	16－20	7	Nurse	Yes	No	Diagnostic imaging	Angiography	Endoscopy / Fluoroscopy	Nuclear medicine	Radiotherapy
82	0	1	2	0	3	3	1	0	0	2	2	0	1	1	2	3	6	1	3	2	1	4	3	53	Female	Unmarried	No	31 or more	2	Nurse manager	none	No	Angiography	Nuclear medicine
83	3	6	6	3	5	3	3	3	1	4	1	5	3	3	3	2	1	2	3	6	6	1	2	36	Female	Married	Yes	11―15	4	Nurse	none	Yes	Diagnostic imaging	Angiography
84	3	4	4	3	3	2	2	2	2	3	2	3	2	2	2	0	4	3	3	1	3	2	0	47	Female	Married	No	21－25	5	Nurse	Yes	No	Nuclear medicine
85	4	4	4	3	4	3	3	4	3	3	3	3	3	3	3	3	4	4	3	3	4	2	1	45	Female	Married	Yes	21－25	10 or more	Nurse	none	No	Diagnostic imaging	Angiography	Endoscopy / Fluoroscopy
86	0	1	1	0	2	2	0	0	1	4	0	1	1	0	0	6	6	1	3	2	6	3	0	43	Female	Married	Yes	16－20	3	Nurse	none	No	Nuclear medicine
87	4	5	5	4	4	3	4	4	3	5	3	2	3	5	3	1	3	5	2	3	4	4	4	59	Male	Married	Yes	26－30	3	Nurse	none	Yes	Angiography
88	2	3	5	4	4	3	3	2	2	4	3	2	2	2	2	0	2	3	6	5	5	5	2	49	Female	Married	Yes	26－30	1	Nurse	none	No	Diagnostic imaging	Angiography	Endoscopy / Fluoroscopy
89	4	5	5	4	6	4	6	4	4	5	5	6	4	5	5	4	6	2	5	3	2	3	5	48	Female	Married	Yes	26－30	2	Nurse	none	Yes	Diagnostic imaging	Angiography
90	3	4	5	2	5	5	2	2	2	4	4	1	1	2	2	3	5	0	5	4	5	0	2	48	Female	Unmarried	No	21－25	10 or more	Nurse	Yes	Yes	Radiotherapy
91	2	2	2	1	5	6	2	2	2	3	6	2	2	6	1	6	1	5	6	6	6	6	1	46	Female	Married	No	21－25	10 or more	Nurse	Yes	No	Angiography
92	4	4	5	4	5	3	4	4	3	4	3	4	3	4	4	2	5	1	3	5	5	2	3	54	Female	Unmarried	No	31 or more	2	Nurse manager	none	No	management
93	2	4	3	2	2	2	2	0	0	4	0	0	0	0	0	0	2	3	4	2	5	0	0	30	Female	Unmarried	No	5―10	7	Nurse	Yes	No	Diagnostic imaging	Angiography
94	3	3	6	3	4	0	2	0	0	3	0	0	3	0	2	0	3	2	2	2	3	4	2	39	Female	Married	Yes	16－20	1	Nurse	none	No	Diagnostic imaging	Angiography	Endoscopy / Fluoroscopy	Radiotherapy
95	3	5	5	3	4	3	4	3	3	5	3	1	4	3	4	1	4	5	3	1	2	4	3	45	Female	Unmarried	No	21－25	1	Nurse	none	Yes	Angiography
96	2	5	5	2	5	3	3	2	2	5	3	0	3	5	2	0	5	3	3	0	2	3	3	32	Female	Unmarried	No	11―15	5	Nurse	none	No	Nuclear medicine	Radiotherapy
97	3	3	5	4	4	4	4	2	5	5	4	3	3	3	3	3	3	3	3	3	2	6	2	49	Female	Married	No	21－25	9	Nurse	Yes	No	Angiography	Nuclear medicine
98	3	3	6	3	4	2	2	5	2	4	6	6	3	5	2	6	4	6	4	3	4	2	0	50	Female	Married	Yes	26－30	10 or more	Nurse manager	none	Yes	Diagnostic imaging	Angiography	Endoscopy / Fluoroscopy	Nuclear medicine	Radiotherapy
99	4	5	5	4	5	0	3	3	3	4	0	4	3	4	4	2	6	6	2	2	2	6	1	40	Female	Unmarried	Yes	21－25	2	Nurse	Yes	No	Angiography	Endoscopy / Fluoroscopy	Nuclear medicine	Radiotherapy
100	4	4	4	2	4	0	2	0	0	1	0	0	1	0	1	4	4	0	5	6	6	0	3	40	Female	Married	Yes	16－20	1	Nurse	none	No	Radiotherapy
101	1	1	6	2	5	6	1	0	1	2	3	2	2	5	3	2	3	3	6	6	6	6	3	42	Female	Unmarried	No	11―15	1	Nurse	none	No	Angiography	Radiotherapy
102	5	5	6	5	5	5	5	4	3	4	4	5	5	5	4	4	6	5	5	2	2	4	2	48	Female	Married	Yes	16－20	6	Nurse	none	No	Diagnostic imaging	Angiography	Endoscopy / Fluoroscopy	Nuclear medicine	Radiotherapy
103	0	4	4	2	4	2	2	1	4	4	2	1	3	3	2	3	4	3	3	1	4	3	4	32	Male	Married	No	5―10	1	Nurse	none	No	Diagnostic imaging	Angiography
104	3	4	5	4	5	4	3	4	3	4	2	4	3	3	3	3	3	5	3	3	5	3	3	51	Female	Married	Yes	21―25	8	Nurse	none	No	Nuclear medicine	Radiotherapy
105	4	4	5	4	4	5	4	3	4	5	4	3	4	4	3	4	4	4	4	4	5	3	1	58	Female	Married	No	21－25	8	Nurse	none	No	Diagnostic imaging	Nuclear medicine
106	3	2	3	2	3	2	2	2	2	2	2	2	2	2	2	1	3	4	0	0	5	4	3	45	Female	Unmarried	Yes	21－25	3	Nurse	none	No	Endoscopy / Fluoroscopy
107	3	3	3	3	3	3	3	3	3	3	3	3	3	3	3	3	3	3	3	3	3	3	3	41	Male	Married	Yes	16―20	2	Nurse	none	Yes	Diagnostic imaging	Angiography	Endoscopy / Fluoroscopy
108	3	4	5	4	3	3	3	3	3	6	3	0	2	3	3	0	5	1	5	3	5	3	0	44	Female	Married	Yes	21－25	8	Nurse	Yes	No	Diagnostic imaging	Angiography	Nuclear medicine
109	5	6	4	5	6	4	5	5	5	6	5	3	5	5	5	3	5	1	6	6	6	1	1	58	Female	Married	No	31 or more	1	Nurse	none	No	Radiotherapy
110	3	3	3	3	3	3	2	1	1	5	1	3	2	3	2	3	2	6	6	4	6	2	3	55	Female	Unmarried	No	31 or more	6	Nurse	Yes	No	Radiotherapy
111	4	4	5	5	5	5	5	3	3	5	4	5	4	4	4	1	4	4	6	6	6	4	6	47	Female	Married	Yes	21－25	5	Nurse	none	Yes	Angiography	Endoscopy / Fluoroscopy	Nuclear medicine	Radiotherapy
112	3	3	2	2	2	2	2	0	1	2	2	0	2	2	2	2	2	3	4	5	5	4	4	41	Female	Married	Yes	5―10	1	Nurse	none	No	Diagnostic imaging	Angiography	Endoscopy / Fluoroscopy	Radiotherapy
113	3	3	4	3	2	5	5	3	3	5	3	2	3	3	3	3	3	1	4	3	3	4	4	45	Prefer not to answer	Married	Yes	21－25	5	Nurse	none	No	Angiography	Endoscopy / Fluoroscopy	Radiotherapy
114	4	5	5	4	5	5	5	3	2	5	5	4	5	4	5	4	4	3	2	5	3	2	0	39	Male	Married	Yes	16―20	6	Nurse	Yes	Yes	Diagnostic imaging	Angiography	Endoscopy / Fluoroscopy	Nuclear medicine	Radiotherapy
115	4	4	4	4	4	3	4	4	4	4	4	4	4	4	4	4	4	4	4	5	6	4	2	40	Female	Married	No	16―20	5	Nurse	none	Yes	Angiography
116	4	4	4	4	4	4	4	4	4	4	4	4	4	4	4	2	4	4	4	4	4	4	3	53	Female	Married	No	26―30	3	Nurse manager	none	No	Endoscopy / Fluoroscopy	Diagnostic imaging
117	3	4	4	3	4	4	3	2	3	4	3	3	3	3	2	2	4	3	5	4	4	4	1	59	Female	Married	No	26―30	3	Nurse	none	No	Radiotherapy
118	5	6	6	5	6	6	5	4	4	6	6	6	5	6	5	6	6	3	5	3	5	3	0	45	Female	Married	Yes	21―25	7	Nurse manager	Yes	No	Radiotherapy
119	4	5	4	4	5	4	4	4	4	5	4	5	4	5	4	5	4	3	5	6	4	4	3	38	Female	Married	Yes	16―20	10 or more	Nurse	none	No	Diagnostic imaging	Angiography	Endoscopy / Fluoroscopy	Nuclear medicine	Radiotherapy
120	2	3	4	3	3	0	2	2	2	3	3	4	2	3	3	6	5	3	2	2	6	2	0	31	Female	Married	Yes	5―10	2	Nurse	none	No	Diagnostic imaging	Angiography	Endoscopy / Fluoroscopy	Nuclear medicine	Radiotherapy
121	4	4	5	3	5	2	4	3	2	4	2	2	4	4	3	5	6	2	5	4	5	3	2	60	Female	Unmarried	No	31 or more	5	Nurse manager	none	No	Diagnostic imaging	Angiography	Endoscopy / Fluoroscopy	Nuclear medicine	Radiotherapy
122	4	6	6	3	6	3	4	2	3	6	6	5	5	5	2	6	6	3	3	3	3	6	6	61	Female	Unmarried	No	26―30	9	Nurse	Yes	Yes	Endoscopy / Fluoroscopy
123	4	4	5	5	3	5	4	1	2	4	4	1	4	3	4	4	4	3	2	2	3	3	3	40	Female	Married	Yes	16―20	4	Nurse	none	No	Angiography	Endoscopy / Fluoroscopy	Radiotherapy
124	0	3	2	2	5	1	1	0	5	6	5	1	4	2	2	5	5	0	4	5	5	1	6	34	Female	Unmarried	No	11―15	1	Nurse manager	none	No	Radiotherapy
125	4	4	5	3	5	4	4	2	3	4	3	4	3	3	3	5	5	4	2	2	5	6	5	51	Female	Married	Yes	26―30	3	Nurse manager	none	No	Diagnostic imaging	Endoscopy / Fluoroscopy	Nuclear medicine	Radiotherapy
126	5	6	5	3	4	3	4	5	3	5	3	4	5	3	4	3	3	3	6	3	4	4	1	65	Female	Married	No	31 or more	10 or more	Nurse	none	No	Radiotherapy
127	4	4	6	3	4	0	5	3	4	5	4	1	4	3	3	4	3	3	3	2	3	3	4	37	Female	Unmarried	No	11―15	4	Nurse	Yes	Yes	Diagnostic imaging	Angiography	Endoscopy / Fluoroscopy	Nuclear medicine	Radiotherapy
128	0	4	5	0	0	0	0	0	0	4	0	3	0	0	0	4	4	1	6	4	3	3	3	58	Female	Unmarried	No	31 or more	2	Nurse	none	No	Diagnostic imaging	Radiotherapy
129	2	3	3	3	3	3	2	2	2	4	2	3	2	2	3	2	4	3	6	5	4	3	3	42	Female	Married	Yes	21―25	4	Nurse manager	none	No	Diagnostic imaging	Endoscopy / Fluoroscopy	Nuclear medicine
130	4	5	4	4	3	2	4	2	3	5	3	2	1	0	4	1	4	2	4	5	5	1	2	52	Female	Married	Yes	26―30	4	Nurse	none	No	Angiography	Endoscopy / Fluoroscopy	Nuclear medicine	Radiotherapy
131	4	5	5	4	5	4	4	3	4	5	4	4	4	4	4	3	4	2	3	3	4	3	3	37	Female	Unmarried	Yes	11―15	8	Nurse manager	Yes	Yes	Angiography	Endoscopy / Fluoroscopy	Nuclear medicine
132	4	4	4	4	4	2	4	3	4	4	4	3	4	3	4	3	3	3	4	3	4	4	1	29	Female	Married	Yes	5―10	2	Nurse	none	Yes	Diagnostic imaging	Endoscopy / Fluoroscopy	Nuclear medicine	Radiotherapy
133	3	6	5	4	4	4	5	4	4	6	1	0	2	4	3	5	5	1	6	6	6	1	0	52	Female	Unmarried	No	31 or more	2	Nurse manager	none	No	Nuclear medicine
134	2	2	2	2	2	1	2	3	2	3	3	2	3	3	3	3	2	5	1	1	1	3	1	53	Female	Married	No	21―25	10 or more	Nurse	none	No	Diagnostic imaging	Nuclear medicine
135	4	4	4	4	4	1	4	4	4	5	2	3	4	3	4	2	4	4	3	3	3	3	3	56	Female	Married	No	31 or more	2	Nurse	none	No	Angiography	Endoscopy / Fluoroscopy	Nuclear medicine	Radiotherapy
136	2	2	6	2	4	0	3	3	0	3	0	0	0	0	2	0	3	4	3	3	3	5	3	40	Female	Married	Yes	16―20	1	Nurse	none	No	Diagnostic imaging	Angiography	Endoscopy / Fluoroscopy	Radiotherapy
137	6	6	6	6	6	5	6	5	5	6	5	4	5	5	5	3	5	4	6	6	6	1	2	64	Female	Married	No	31 or more	10 or more	Nurse	none	Yes	Nuclear medicine
138	4	5	6	5	6	6	6	5	4	6	6	5	6	6	5	2	5	0	6	4	5	0	0	57	Female	Married	No	31 or more	2	Nurse manager	none	No	Nuclear medicine
139	2	4	5	1	3	2	2	1	2	4	2	0	1	3	1	5	6	4	4	1	4	2	1	44	Female	Unmarried	Yes	21―25	10 or more	Nurse manager	none	Yes	Diagnostic imaging	Angiography	Endoscopy / Fluoroscopy
140	3	3	5	3	3	0	3	0	0	3	0	0	1	0	0	0	5	4	4	6	4	3	2	42	Female	Married	Yes	11―15	1	Nurse	none	Yes	Endoscopy / Fluoroscopy
